# Supplementary material
Source: publisher site journal article supplement (https://www.dovepress.com/article/391455)
Supplement: Supplementary file 1 [file get_supplementary_file.php]

**Supplementary file.**

*Statistical analysis*

Health states were defined by KCCQ-CSS score quartiles at baseline for the ITT population of EMPEROR- Reduced: quartile 1 [0 to <55.2], quartile 2 [55.2 to <75.0], quartile 3 [75.0 to <89.6], quartile 4 [89.6 to 100] and EMPEROR-Preserved: quartile 1 [0 to <55.7], quartile 2 [55.7 to <74.0], quartile 3 [74.0 to <88.0], quartile 4 [88.0 to 100]. Three sets of transition matrices were constructed from the data, which corresponded to transitions from baseline to week 12, from week 12 to week 32, and from week 32 to week 52. Monthly transition matrices were derived by calculating the appropriate roots of the corresponding longer period matrices using the imputed data. The transition matrices for the empagliflozin and placebo arms are presented in Table S1 and S2. When deriving data from EMPEROR-Preserved trial monthly KCCQ-CSS transition matrices over the period of week 32 to week 52 in the empagliflozin arm, root calculations produced a monthly matrix that was invalid, as it did not fulfil the condition of all cell values being bounded from 0 to 1, and rows summing to 1. As a remedy, a quasi-optimization method was used to find the “closest” valid probability matrix using the ctmcd package13 in R.

Table S1. Monthly transition probability matrices for KCCQ-CSS health states in the HFrEF model.

| **Empagliflozin + SC** | | | | | | |
| --- | --- | --- | --- | --- | --- | --- |
| **KCCQ-CSS quartile transitions [From, To]** | **Months 1–3** | | **Months 4–8** | | **Months 9+** | |
| **Monthly transitions** | **SEa** | **Monthly transitions** | **SEa** | **Monthly transitions** | **SEa** |
| KCCQ [1,1] | 0.79700 | 0.00014 | 0.91000 | 0.00007 | 0.91800 | 0.00007 |
| KCCQ [1,2] | 0.15500 | 0.00023 | 0.07700 | 0.00013 | 0.06500 | 0.00011 |
| KCCQ [1,3] | 0.02500 | 0.00005 | 0.00500 | 0.00001 | 0.01300 | 0.00004 |
| KCCQ [1,4] | 0.02300 | 0.00007 | 0.00800 | 0.00003 | 0.00400 | 0.00001 |
| KCCQ [2,1] | 0.06600 | 0.00015 | 0.06800 | 0.00010 | 0.05100 | 0.00008 |
| KCCQ [2,2] | 0.70800 | 0.00012 | 0.84000 | 0.00006 | 0.88100 | 0.00007 |
| KCCQ [2,3] | 0.18800 | 0.00029 | 0.08300 | 0.00011 | 0.06100 | 0.00008 |
| KCCQ [2,4] | 0.03800 | 0.00008 | 0.00900 | 0.00002 | 0.00700 | 0.00002 |
| KCCQ [3,1] | 0.00400 | 0.00002 | 0.00500 | 0.00001 | 0.00400 | 0.00001 |
| KCCQ [3,2] | 0.08200 | 0.00017 | 0.07000 | 0.00010 | 0.05400 | 0.00008 |
| KCCQ [3,3] | 0.77200 | 0.00013 | 0.84800 | 0.00006 | 0.86800 | 0.00006 |
| KCCQ [3,4] | 0.14200 | 0.00019 | 0.07700 | 0.00009 | 0.07400 | 0.00009 |
| KCCQ [4,1] | 0.00600 | 0.00003 | 0.00400 | 0.00002 | 0.00300 | 0.00001 |
| KCCQ [4,2] | 0.01600 | 0.00005 | 0.00000 | 0.00000 | 0.00600 | 0.00001 |
| KCCQ [4,3] | 0.07400 | 0.00015 | 0.06300 | 0.00008 | 0.04400 | 0.00005 |
| KCCQ [4,4] | 0.90400 | 0.00011 | 0.93300 | 0.00004 | 0.94700 | 0.00004 |
| **SC** | | | | | | |
| **KCCQ-CSS quartile transitions [From, To]** | **Months 1–3** | | **Months 4–8** | | **Months 9+** | |
| **Monthly transitions** | **SEa** | **Monthly transitions** | **SEa** | **Monthly transitions** | **SEa** |
| KCCQ [1,1] | 0.83500 | 0.00014 | 0.90400 | 0.00007 | 0.92900 | 0.00007 |
| KCCQ [1,2] | 0.13300 | 0.00021 | 0.08200 | 0.00013 | 0.05600 | 0.00009 |
| KCCQ [1,3] | 0.01400 | 0.00003 | 0.00900 | 0.00002 | 0.01300 | 0.00003 |
| KCCQ [1,4] | 0.01800 | 0.00007 | 0.00500 | 0.00002 | 0.00200 | 0.00001 |
| KCCQ [2,1] | 0.06900 | 0.00011 | 0.05800 | 0.00009 | 0.05100 | 0.00008 |
| KCCQ [2,2] | 0.72000 | 0.00006 | 0.85000 | 0.00006 | 0.86700 | 0.00007 |
| KCCQ [2,3] | 0.20300 | 0.00027 | 0.07900 | 0.00011 | 0.07600 | 0.00010 |
| KCCQ [2,4] | 0.00800 | 0.00002 | 0.01300 | 0.00003 | 0.00600 | 0.00001 |
| KCCQ [3,1] | 0.01300 | 0.00003 | 0.01100 | 0.00003 | 0.01300 | 0.00003 |
| KCCQ [3,2] | 0.11200 | 0.00013 | 0.05800 | 0.00007 | 0.05400 | 0.00006 |
| KCCQ [3,3] | 0.74300 | 0.00005 | 0.85900 | 0.00006 | 0.87100 | 0.00006 |
| KCCQ [3,4] | 0.13200 | 0.00017 | 0.07200 | 0.00009 | 0.06200 | 0.00008 |
| KCCQ [4,1] | 0.00600 | 0.00003 | 0.00400 | 0.00002 | 0.00000 | 0.00000 |
| KCCQ [4,2] | 0.00900 | 0.00002 | 0.00800 | 0.00002 | 0.00500 | 0.00001 |
| KCCQ [4,3] | 0.09600 | 0.00010 | 0.05800 | 0.00006 | 0.04900 | 0.00005 |
| KCCQ [4,4] | 0.88900 | 0.00005 | 0.93000 | 0.00005 | 0.94600 | 0.00005 |

**Notes:** a Due to the missing standard error (SE) inputs, it was assumed that the relative variation around mean estimates would be similar to that of dapagliflozin in the study by McEwan et al. 202030. **Abbreviations**: KCCQ-CSS, Kansas City cardiomyopathy questionnaire - clinical summary score; SC, standard care; SE, standard error.

Table S2. Monthly transition probability matrices for KCCQ-CSS health states in the HFpEF model.

| **Empagliflozin + SC** | | | | | | |
| --- | --- | --- | --- | --- | --- | --- |
| **KCCQ-CSS quartile transitions [From, To]** | **Months 1–3** | | **Months 4–8** | | **Months 9+** | |
| **Monthly transitions** | **SEa** | **Monthly transitions** | **SEa** | **Monthly transitions** | **SEa** |
| KCCQ [1,1] | 0.81400 | 0.00014 | 0.91200 | 0.00007 | 0.92600 | 0.00007 |
| KCCQ [1,2] | 0.15800 | 0.00024 | 0.07600 | 0.00012 | 0.06300 | 0.00010 |
| KCCQ [1,3] | 0.02300 | 0.00005 | 0.01000 | 0.00003 | 0.01100 | 0.00003 |
| KCCQ [1,4] | 0.00500 | 0.00001 | 0.00200 | 0.00001 | 0.00000 | 0.00000 |
| KCCQ [2,1] | 0.06700 | 0.00015 | 0.06300 | 0.00010 | 0.06400 | 0.00010 |
| KCCQ [2,2] | 0.73100 | 0.00013 | 0.84000 | 0.00006 | 0.84700 | 0.00006 |
| KCCQ [2,3] | 0.16500 | 0.00025 | 0.08100 | 0.00011 | 0.08500 | 0.00011 |
| KCCQ [2,4] | 0.03700 | 0.00007 | 0.01600 | 0.00003 | 0.00400 | 0.00001 |
| KCCQ [3,1] | 0.01700 | 0.00008 | 0.00500 | 0.00001 | 0.00300 | 0.00001 |
| KCCQ [3,2] | 0.09100 | 0.00019 | 0.07700 | 0.00011 | 0.07800 | 0.00011 |
| KCCQ [3,3] | 0.72300 | 0.00013 | 0.83800 | 0.00005 | 0.84200 | 0.00005 |
| KCCQ [3,4] | 0.16900 | 0.00022 | 0.08000 | 0.00009 | 0.07700 | 0.00009 |
| KCCQ [4,1] | 0.00500 | 0.00003 | 0.00300 | 0.00001 | 0.00000 | 0.00000 |
| KCCQ [4,2] | 0.01000 | 0.00003 | 0.00900 | 0.00002 | 0.00600 | 0.00001 |
| KCCQ [4,3] | 0.08500 | 0.00017 | 0.05800 | 0.00007 | 0.05200 | 0.00006 |
| KCCQ [4,4] | 0.90000 | 0.00011 | 0.93000 | 0.00004 | 0.94200 | 0.00004 |
| **SC** | | | | | | |
| **KCCQ-CSS quartile transitions [From, To]** | **Months 1–3** | | **Months 4–8** | | **Months 9+** | |
| **Monthly transitions** | **SEa** | **Monthly transitions** | **SEa** | **Monthly transitions** | **SEa** |
| KCCQ [1,1] | 0.82800 | 0.00014 | 0.91300 | 0.00007 | 0.92600 | 0.00007 |
| KCCQ [1,2] | 0.13800 | 0.00023 | 0.07200 | 0.00011 | 0.06000 | 0.00009 |
| KCCQ [1,3] | 0.03300 | 0.00008 | 0.01100 | 0.00003 | 0.01000 | 0.00002 |
| KCCQ [1,4] | 0.00100 | 0.00000 | 0.00400 | 0.00002 | 0.00400 | 0.00002 |
| KCCQ [2,1] | 0.09000 | 0.00019 | 0.06400 | 0.00010 | 0.05600 | 0.00009 |
| KCCQ [2,2] | 0.74200 | 0.00013 | 0.84800 | 0.00006 | 0.86700 | 0.00007 |
| KCCQ [2,3] | 0.14000 | 0.00021 | 0.07700 | 0.00010 | 0.06600 | 0.00009 |
| KCCQ [2,4] | 0.02800 | 0.00005 | 0.01100 | 0.00002 | 0.01100 | 0.00002 |
| KCCQ [3,1] | 0.01000 | 0.00004 | 0.00500 | 0.00001 | 0.01100 | 0.00003 |
| KCCQ [3,2] | 0.09300 | 0.00017 | 0.07600 | 0.00009 | 0.07400 | 0.00009 |
| KCCQ [3,3] | 0.73500 | 0.00013 | 0.84800 | 0.00006 | 0.84500 | 0.00006 |
| KCCQ [3,4] | 0.16200 | 0.00025 | 0.07100 | 0.00009 | 0.07000 | 0.00009 |
| KCCQ [4,1] | 0.00100 | 0.00001 | 0.00400 | 0.00002 | 0.00100 | 0.00000 |
| KCCQ [4,2] | 0.01600 | 0.00006 | 0.00800 | 0.00002 | 0.00800 | 0.00002 |
| KCCQ [4,3] | 0.09000 | 0.00017 | 0.05300 | 0.00006 | 0.05600 | 0.00006 |
| KCCQ [4,4] | 0.89300 | 0.00012 | 0.93500 | 0.00005 | 0.93500 | 0.00005 |

**Notes:** a Due to the missing standard error (SE) inputs, it was assumed that the relative variation around mean estimates would be similar to that of dapagliflozin in the study by McEwan et al. 202030.  **Abbreviations**: KCCQ-CSS, Kansas City cardiomyopathy questionnaire - clinical summary score; SC, standard care; SE, standard error.

Table S3. Risk and survival equations for hospitalisation due to HF, CV death, all-cause death, and treatment discontinuation in HFrEF model.

| **Covariate** | **Coefficients** | **SE** | **p-value** | **Equation/model** |
| --- | --- | --- | --- | --- |
| **Hospitalization due to HF** | | | | |
| Intercept | –3.347 | 0.085 | 0.000 | Risk equation / poisson model |
| Treatment effecta | –0.325 | 0.097 | 0.001 |
| KCCQ-CSS: 55 to <75 (Quartile 2)b | –0.450 | 0.103 | 0.000 |
| KCCQ-CSS: 75 to <90 (Quartile 3)b | –0.938 | 0.114 | 0.000 |
| KCCQ-CSS: 90 to 100 (Quartile 4)b | –1.352 | 0.142 | 0.000 |
| **CV death** | | | |  |
| Shape | 0.149c | 0.052 | 0.000 | Survival equation/ Weibull distribution |
| Scale | –8.667c | 0.000 | 0.003 |
| Treatment effect | –0.059 | 0.102 | 0.562 |
| KCCQ-CSS: 55 to <75 (Quartile 2)b | –0.675 | 0.129 | 0.000 |
| KCCQ-CSS: 75 to <90 (Quartile 3)b | –1.183 | 0.143 | 0.000 |
| KCCQ-CSS: 90 to 100 (Quartile 4)b | –1.362 | 0.148 | 0.000 |
| **All-cause death** | | | | |
| Shape | 0.185c | 0.047 | 0.000 | Survival equation/Weibull distribution |
| Scale | –8.695c | 0.000 | 0.001 |
| Treatment effect | –0.044 | 0.088 | 0.615 |
| KCCQ-CSS: 55 to <75 (Quartile 2)b | –0.609 | 0.112 | 0.000 |
| KCCQ-CSS: 75 to <90 (Quartile 3)b | –1.161 | 0.126 | 0.000 |
| KCCQ-CSS: 90 to 100 (Quartile 4)b | –1.299 | 0.128 | 0.000 |
| **Treatment discontinuation** | | | | |
| Shape | 0.000 |  |  | Risk equation / exponential distribution |
| Scale | -0.001 | 0.000 | <0.001 |
| Treatment effect | -0.091 | 0.080 |  |
| KCCQ-CSS: 55 to <75 (Quartile 2)b | -0.519 | 0.107 |  |
| KCCQ-CSS: 75 to <90 (Quartile 3)b | -0.680 | 0.106 |  |
| KCCQ-CSS: 90 to 100 (Quartile 4)b | -1.099 | 0.117 |  |

**Notes:** aEqual empagliflozin treatment effect is applied in all quartiles for the empagliflozin group, bvs. KCCQ-CSS: 0 to <55.0 (Quartile 1) c logarithmic scale.

**Abbreviations**: CV, cardiovascular; HF, heart failure; KCCQ-CSS, Kansas City cardiomyopathy questionnaire - clinical summary score; SE = standard error.

Table S4. Risk and survival equations for hospitalisation due to HF, CV death, all-cause death and treatment discontinuation in HFpEF model.

| **Covariate** | **Coefficients** | **SE** | **P-value** | **Equation/model** |
| --- | --- | --- | --- | --- |
| **Hospitalization due to HF** | | | | |
| Intercept | -4.291 | 0.081 | 0.000 | Risk equation / poisson model |
| Treatment effecta | -0.254 | 0.098 | 0.010 |
| KCCQ-CSS: 55.7 to <74.0 (Quartile 2)b | -0.653 | 0.110 | 0.000 |
| KCCQ-CSS: 74.0 to <88.0 (Quartile 3)b | -1.074 | 0.118 | 0.000 |
| KCCQ-CSS: 88.0 to 100 (Quartile 4)b | -1.160 | 0.132 | 0.000 |
| **CV death** | | | |  |
| Shape | 0.201c | 0.052 | 0.000 | Survival equation/ Weibull distribution |
| Scale | -10.150c | 0.000 | 0.006 |
| Treatment effect (empagliflozin) | -0.082 | 0.093 | 0.380 |
| KCCQ-CSS: 55.7 to <74.0 (Quartile 2)b | -0.328 | 0.118 | 0.005 |
| KCCQ-CSS: 74.0 to <88.0 (Quartile 3)b | -0.709 | 0.130 | 0.000 |
| KCCQ-CSS: 88.0 to 100 (Quartile 4)b | -1.147 | 0.138 | 0.000 |
| **All-cause death** | | | | |
| Shape | 0.323c | 0.043 | 0.000 | Survival equation/Weibull distribution |
| Scale | -10.716c | 0.000 | 0.001 |
| Treatment effect | 0.016 | 0.069 | 0.821 |
| KCCQ-CSS: 55.7 to <74.0 (Quartile 2)b | -0.332 | 0.090 | 0.000 |
| KCCQ-CSS: 74.0 to <88.0 (Quartile 3)b | -0.601 | 0.096 | 0.000 |
| KCCQ-CSS: 88.0 to 100 (Quartile 4)b | -0.969 | 0.099 | 0.000 |
| **Treatment discontinuation** | | | | |
| Mu (intercept) | 7.504 | 0.099 | 0.000 | Risk equation/generalised gamma distribution |
| Sigma | 0.650 | 0.282 | 0.021 |
| Q | 1.846 | 0.828 | 0.026 |
| KCCQ-CSS: 55.7 to <74.0 (Quartile 2)b | 0.300 | 0.096 | 0.002 |
| KCCQ-CSS: 74.0 to <88.0 (Quartile 3)b | 0.427 | 0.096 | <0.001 |
| KCCQ-CSS: 88.0 to 100 (Quartile 4)b | 0.757 | 0.103 | <0.001 |

**Notes:** aEqual empagliflozin treatment effect is applied in all quartiles for the empagliflozin group. bvs. KCCQ-CSS: 0 to <55.7 (Quartile 1)

clogarithmic scale

**Abbreviations**: CV, cardiovascular; HF, heart failure; KCCQ-CSS, Kansas City Cardiomyopathy Questionnaire - clinical summary score; SE, standard error.

Table S5. Detailed results for the base case analysis estimated over lifetime horizon.

| **Base-case** | **Empagliflozin +SC** | **SC** | **Incremental** |
| --- | --- | --- | --- |
| Total costs, € | 17,865 | 16,271 | 1,594 |
| Treatment and AE management costs, € | 6,931 | 4,957 | 1,974 |
| Clinical event management costs, € (HHF, CV and non-CV death costs) | 3,941 | 4,365 | -423 |
| Disease management costs, € | 6,993 | 6,949 | 43 |
| Total Lys | 6.541 | 6.414 | 0.127 |
| Total QALYs | 4.363 | 4.213 | 0.150 |
| ICER, €/QALY | - | - | 10,621 |
| HHF events (per 1000 treated patients) | 887 | 1,023 | -135 |
| 1-year survival, % | 93.1 | 92.7 | 0.4 |
| 2-year survival, % | 84.7 | 83.9 | 0.7 |
| 5-year survival, % | 59.4 | 58.1 | 1.3 |
| **HErEF** | | | |
| Total costs, € | 18,801 | 17,248 | 1,552 |
| Treatment and AE management costs, € | 8,078 | 6,020 | 2,057 |
| Clinical event management costs, € (HHF, CV and non-CV death costs) | 4,831 | 5,468 | -637 |
| Disease management cost, € | 5,892 | 5,760 | 132 |
| Total LYs | 5.983 | 5.768 | 0.215 |
| Total QALYs | 3.943 | 3.719 | 0.224 |
| ICER, €/QALY | - | - | 6,927 |
| HHF events (per 1000 treated patients) | 1,203 | 1,407 | -203 |
| 1-year survival, % | 90.9 | 90.2 | 0.8 |
| 2-year survival, % | 81.0 | 79.6 | 1.4 |
| 5-year survival, % | 53.9 | 51.7 | 2.2 |
| **HEpEF** | | | |
| Total costs, € | 17,040 | 15,410 | 1,631 |
| Treatment and AE management costs, € | 5,921 | 4,020 | 1,901 |
| Clinical event management costs, € (HHF, CV and non-CV death costs) | 3,158 | 3,393 | -235 |
| Disease management cost, € | 7,962 | 7,997 | -35 |
| Total LYs | 7.032 | 6.982 | 0.050 |
| Total QALYs | 4.732 | 4.648 | 0.085 |
| ICER, €/QALY | - | - | 19,211 |
| HHF events (per 1000 treated patients) | 609 | 685 | -76 |
| 1-year survival, % | 94.9 | 94.9 | 0.1 |
| 2-year survival, % | 87.9 | 87.8 | 0.1 |
| 5-year survival, % | 64.1 | 63.7 | 0.4 |

**Abbreviations**: CV,cardiovascular; HHF, hospitalization due to heart failure; ICER, incremental cost-effectiveness ratio; LY, life year; QALYs, quality of life years; SC, standard care.
